# Supplementary material
Source: bioRxiv or medRxiv preprint supplement (https://medrxiv.org/content/medrxiv/early/2023/11/07/2023.11.03.23298025/DC5/embed/media-5.pdf)
Supplement: Supplementary file [file media-5.pdf]

## Supplementary Material (EA Tables)

### Posterior probability of resistance (Mid) with upper and lower 95% credible intervals

| Initial.Antibiotic | Mid | Meropenem |       |         | Pip.Taz. |       |         | Ceftazidime |       |         | Cefotaxime. |       |         | Cefuroxime |       |  |
|--------------------|-----|-----------|-------|---------|----------|-------|---------|-------------|-------|---------|-------------|-------|---------|------------|-------|--|
|                    |     | Upper     | Lower | Mid     | Upper    | Lower | Mid     | Upper       | Lower | Mid     | Upper       | Lower | Mid     | Upper      | Lower |  |
| Meropenem          | NA  | NA        | NA    | 0.67    | 0.83     | 0.47  | 0.62    | 0.78        | 0.43  | 0.89    | 0.99        | 0.62  | 0.95    | 1.00       | 0.82  |  |
| Pip.Taz            |     | 0.12      | 0.18  | 0.07 NA | 0.34     | 0.44  | 0.24    | 0.47        | 0.56  | 0.38    | 0.44        | 0.78  | 0.86    | 0.67       | 0.99  |  |
| Ceftazidime        |     | 0.13      | 0.21  | 0.07    | 0.57     | 0.68  | 0.43 NA | NA          | NA    | NA      | 0.78        | 0.86  | 0.67    | 0.97       | 0.99  |  |
| Cefotaxime         |     | 0.12      | 0.18  | 0.08    | 0.34     | 0.44  | 0.24    | 0.51        | 0.59  | 0.44 NA | NA          | NA    | 0.99    | 1.00       | 0.98  |  |
| Cefuroxime         |     | 0.07      | 0.11  | 0.05    | 0.29     | 0.36  | 0.22    | 0.36        | 0.42  | 0.31    | 0.57        | 0.62  | 0.52 NA | NA         | NA    |  |
| Gentamicin         |     | 0.15      | 0.28  | 0.07    | 0.46     | 0.58  | 0.33    | 0.45        | 0.59  | 0.35    | 0.45        | 0.59  | 0.35    | 0.58       | 0.71  |  |
| Amikacin           |     | 0.24      | 0.46  | 0.11    | 0.65     | 0.89  | 0.44    | 0.67        | 0.88  | 0.47    | 0.74        | 0.90  | 0.58    | 0.81       | 0.94  |  |
| Coamoxiclav        |     | 0.05      | 0.07  | 0.03    | 0.26     | 0.32  | 0.21    | 0.20        | 0.24  | 0.17    | 0.32        | 0.37  | 0.27    | 0.53       | 0.59  |  |
| Ciprofloxacin      |     | 0.03      | 0.07  | 0.01    | 0.34     | 0.45  | 0.23    | 0.41        | 0.50  | 0.33    | 0.42        | 0.52  | 0.33    | 0.63       | 0.74  |  |
| Seprin             |     | 0.04      | 0.07  | 0.02    | 0.18     | 0.23  | 0.13    | 0.18        | 0.22  | 0.14    | 0.42        | 0.49  | 0.34    | 0.50       | 0.57  |  |

  

| Initial.Antibiotic | Mid | Gentamicin |       |         | Amikacin |       |         | Coamoxiclav |       |         | Ciprofloxacin |       |         | Seprin. |       |  |
|--------------------|-----|------------|-------|---------|----------|-------|---------|-------------|-------|---------|---------------|-------|---------|---------|-------|--|
|                    |     | Upper      | Lower | Mid     | Upper    | Lower | Mid     | Upper       | Lower | Mid     | Upper         | Lower | Mid     | Upper   | Lower |  |
| Meropenem          |     | 0.45       | 0.64  | 0.28    | 0.41     | 0.62  | 0.23    | 0.99        | 1.00  | 0.94    | 0.23          | 0.45  | 0.09    | 0.58    | 0.75  |  |
| Pip.Taz            |     | 0.27       | 0.34  | 0.18    | 0.18     | 0.25  | 0.11    | 0.91        | 0.96  | 0.84    | 0.31          | 0.40  | 0.21    | 0.37    | 0.45  |  |
| Ceftazidime        |     | 0.33       | 0.41  | 0.25    | 0.20     | 0.30  | 0.12    | 0.87        | 0.92  | 0.80    | 0.45          | 0.54  | 0.35    | 0.43    | 0.53  |  |
| Cefotaxime         |     | 0.21       | 0.27  | 0.16    | 0.16     | 0.23  | 0.10    | 0.90        | 0.94  | 0.83    | 0.29          | 0.38  | 0.22    | 0.67    | 0.75  |  |
| Cefuroxime         |     | 0.15       | 0.20  | 0.12    | 0.10     | 0.15  | 0.06    | 0.85        | 0.89  | 0.80    | 0.24          | 0.31  | 0.19    | 0.46    | 0.52  |  |
| Gentamicin         | NA  | NA         | NA    | NA      | 0.23     | 0.37  | 0.11    | 0.82        | 0.89  | 0.73    | 0.55          | 0.66  | 0.43    | 0.58    | 0.71  |  |
| Amikacin           |     | 0.61       | 0.78  | 0.41 NA | NA       | NA    | NA      | 0.85        | 0.94  | 0.71    | 0.66          | 0.86  | 0.41    | 0.45    | 0.64  |  |
| Coamoxiclav        |     | 0.13       | 0.17  | 0.10    | 0.06     | 0.09  | 0.03 NA | NA          | NA    | NA      | 0.17          | 0.21  | 0.13    | 0.44    | 0.48  |  |
| Ciprofloxacin      |     | 0.35       | 0.43  | 0.27    | 0.16     | 0.25  | 0.08    | 0.72        | 0.80  | 0.64 NA | NA            | NA    | NA      | 0.58    | 0.67  |  |
| Seprin             |     | 0.17       | 0.22  | 0.12    | 0.05     | 0.09  | 0.02    | 0.78        | 0.82  | 0.73    | 0.24          | 0.30  | 0.19 NA | NA      | NA    |  |

## All Patients

| Initial.Antibiotic | Mid | Meropenem |       |         | Pip.Taz. |       |         | Ceftazidime |       |         | Cefotaxime. |       |         | Cefuroxime |       |  |
|--------------------|-----|-----------|-------|---------|----------|-------|---------|-------------|-------|---------|-------------|-------|---------|------------|-------|--|
|                    |     | Upper     | Lower | Mid     | Upper    | Lower | Mid     | Upper       | Lower | Mid     | Upper       | Lower | Mid     | Upper      | Lower |  |
| Meropenem          | NA  | NA        | NA    | 0.86    | 1.00     | 0.43  | 0.84    | 1.00        | 0.40  | 0.95    | 1.00        | 0.51  | 0.95    | 1.00       | 0.52  |  |
| Pip.Taz            |     | 0.10      | 0.23  | 0.02 NA | NA       | NA    | 0.43    | 0.62        | 0.83  | 0.36    | 0.65        | 0.83  | 0.41    | 0.82       | 0.94  |  |
| Ceftazidime        |     | 0.13      | 0.32  | 0.03    | 0.86     | 0.98  | 0.65 NA | NA          | NA    | NA      | 0.89        | 0.98  | 0.72    | 0.97       | 1.00  |  |
| Cefotaxime         |     | 0.13      | 0.27  | 0.04    | 0.65     | 0.80  | 0.44    | 0.66        | 0.82  | 0.43 NA | NA          | NA    | 1.00    | 1.00       | 0.97  |  |
| Cefuroxime         |     | 0.09      | 0.20  | 0.03    | 0.55     | 0.69  | 0.38    | 0.49        | 0.64  | 0.33    | 0.68        | 0.82  | 0.53 NA | NA         | NA    |  |
| Gentamicin         |     | 0.05      | 0.22  | 0.00    | 0.42     | 0.74  | 0.13    | 0.36        | 0.68  | 0.06    | 0.34        | 0.64  | 0.06    | 0.45       | 0.75  |  |
| Amikacin           |     | 0.19      | 0.64  | 0.01    | 0.64     | 0.96  | 0.20    | 0.46        | 0.90  | 0.05    | 0.66        | 0.97  | 0.19    | 0.62       | 0.97  |  |
| Coamoxiclav        |     | 0.06      | 0.13  | 0.02    | 0.41     | 0.53  | 0.29    | 0.30        | 0.42  | 0.18    | 0.43        | 0.57  | 0.29    | 0.63       | 0.76  |  |
| Ciprofloxacin      |     | 0.02      | 0.10  | 0.00    | 0.43     | 0.75  | 0.16    | 0.55        | 0.85  | 0.25    | 0.43        | 0.74  | 0.14    | 0.53       | 0.82  |  |
| Seprin             |     | 0.09      | 0.23  | 0.02    | 0.23     | 0.42  | 0.08    | 0.20        | 0.37  | 0.07    | 0.56        | 0.76  | 0.37    | 0.59       | 0.78  |  |

  

| Initial.Antibiotic | Mid | Gentamicin |       |         | Amikacin |       |         | Coamoxiclav |       |         | Ciprofloxacin |       |         | Seprin. |       |  |
|--------------------|-----|------------|-------|---------|----------|-------|---------|-------------|-------|---------|---------------|-------|---------|---------|-------|--|
|                    |     | Upper      | Lower | Mid     | Upper    | Lower | Mid     | Upper       | Lower | Mid     | Upper         | Lower | Mid     | Upper   | Lower |  |
| Meropenem          |     | 0.26       | 0.76  | 0.01    | 0.24     | 0.86  | 0.00    | 0.95        | 1.00  | 0.53    | 0.04          | 0.38  | 0.00    | 0.18    | 0.68  |  |
| Pip.Taz            |     | 0.19       | 0.36  | 0.07    | 0.14     | 0.31  | 0.04    | 0.94        | 1.00  | 0.79    | 0.17          | 0.34  | 0.06    | 0.23    | 0.42  |  |
| Ceftazidime        |     | 0.24       | 0.45  | 0.06    | 0.17     | 0.40  | 0.04    | 0.98        | 1.00  | 0.88    | 0.28          | 0.53  | 0.11    | 0.30    | 0.70  |  |
| Cefotaxime         |     | 0.17       | 0.32  | 0.05    | 0.14     | 0.31  | 0.04    | 0.98        | 1.00  | 0.91    | 0.18          | 0.33  | 0.06    | 0.50    | 0.70  |  |
| Cefuroxime         |     | 0.14       | 0.26  | 0.04    | 0.10     | 0.22  | 0.03    | 0.99        | 1.00  | 0.94    | 0.14          | 0.35  | 0.05    | 0.37    | 0.55  |  |
| Gentamicin         | NA  | NA         | NA    | NA      | 0.24     | 0.59  | 0.03    | 0.80        | 0.97  | 0.46    | 0.43          | 0.72  | 0.16    | 0.50    | 0.81  |  |
| Amikacin           |     | 0.93       | 1.00  | 0.60 NA | NA       | NA    | 0.62    | 0.62        | 0.97  | 0.13    | 0.23          | 0.69  | 0.01    | 0.25    | 0.72  |  |
| Coamoxiclav        |     | 0.15       | 0.24  | 0.07    | 0.07     | 0.15  | 0.02 NA | NA          | NA    | NA      | 0.11          | 0.20  | 0.04    | 0.37    | 0.52  |  |
| Ciprofloxacin      |     | 0.57       | 0.85  | 0.26    | 0.18     | 0.52  | 0.02    | 0.74        | 0.97  | 0.40 NA | NA            | NA    | NA      | 0.37    | 0.70  |  |
| Seprin             |     | 0.27       | 0.45  | 0.12    | 0.07     | 0.21  | 0.01    | 0.86        | 0.96  | 0.71    | 0.13          | 0.30  | 0.03 NA | NA      | NA    |  |

## ICU Patients

| Initial.Antibiotic | Mid | Meropenem |       |         | Pip.Taz. |       |         | Ceftazidime |       |         | Cefotaxime. |       |         | Cefuroxime |       |  |
|--------------------|-----|-----------|-------|---------|----------|-------|---------|-------------|-------|---------|-------------|-------|---------|------------|-------|--|
|                    |     | Upper     | Lower | Mid     | Upper    | Lower | Mid     | Upper       | Lower | Mid     | Upper       | Lower | Mid     | Upper      | Lower |  |
| Meropenem          | NA  | NA        | NA    | 0.93    | 1.00     | 0.71  | 0.93    | 1.00        | 0.72  | 0.97    | 1.00        | 0.71  | 0.97    | 1.00       | 0.72  |  |
| Pip.Taz            |     | 0.37      | 0.66  | 0.16 NA | NA       | NA    | 0.71    | 0.62        | 0.82  | 0.38    | 0.58        | 0.81  | 0.33    | 0.72       | 0.91  |  |
| Ceftazidime        |     | 0.42      | 0.66  | 0.21    | 0.77     | 0.92  | 0.54 NA | NA          | NA    | NA      | 0.88        | 0.98  | 0.70    | 0.99       | 1.00  |  |
| Cefotaxime         |     | 0.42      | 0.68  | 0.21    | 0.62     | 0.82  | 0.40    | 0.71        | 0.90  | 0.45 NA | NA          | NA    | 0.99    | 1.00       | 0.95  |  |
| Cefuroxime         |     | 0.26      | 0.46  | 0.11    | 0.46     | 0.64  | 0.24    | 0.52        | 0.72  | 0.30    | 0.63        | 0.81  | 0.44 NA | NA         | NA    |  |
| Gentamicin         |     | 0.56      | 0.84  | 0.20    | 0.80     | 0.97  | 0.50    | 0.72        | 0.95  | 0.42    | 0.68        | 0.92  | 0.37    | 0.74       | 0.95  |  |
| Amikacin           |     | 0.41      | 0.80  | 0.11    | 0.73     | 0.95  | 0.39    | 0.66        | 0.93  | 0.32    | 0.64        | 0.91  | 0.31    | 0.75       | 0.97  |  |
| Coamoxiclav        |     | 0.21      | 0.41  | 0.09    | 0.48     | 0.67  | 0.30    | 0.36        | 0.56  | 0.19    | 0.46        | 0.66  | 0.30    | 0.66       | 0.82  |  |
| Ciprofloxacin      |     | 0.14      | 0.43  | 0.01    | 0.40     | 0.67  | 0.14    | 0.39        | 0.68  | 0.13    | 0.44        | 0.71  | 0.17    | 0.49       | 0.79  |  |
| Seprin             |     | 0.24      | 0.52  | 0.07    | 0.36     | 0.60  | 0.15    | 0.35        | 0.61  | 0.14    | 0.59        | 0.79  | 0.39    | 0.61       | 0.80  |  |

  

| Initial.Antibiotic | Mid | Gentamicin |       |         | Amikacin |       |         | Coamoxiclav |       |         | Ciprofloxacin |       |         | Seprin. |       |  |
|--------------------|-----|------------|-------|---------|----------|-------|---------|-------------|-------|---------|---------------|-------|---------|---------|-------|--|
|                    |     | Upper      | Lower | Mid     | Upper    | Lower | Mid     | Upper       | Lower | Mid     | Upper         | Lower | Mid     | Upper   | Lower |  |
| Meropenem          |     | 0.70       | 0.94  | 0.36    | 0.54     | 0.87  | 0.19    | 0.97        | 1.00  | 0.69    | 0.37          | 0.85  | 0.03    | 0.39    | 0.74  |  |
| Pip.Taz            |     | 0.32       | 0.55  | 0.12    | 0.30     | 0.56  | 0.09    | 0.87        | 0.98  | 0.62    | 0.31          | 0.64  | 0.09    | 0.42    | 0.75  |  |
| Ceftazidime        |     | 0.39       | 0.64  | 0.18    | 0.38     | 0.62  | 0.16    | 0.92        | 0.99  | 0.75    | 0.35          | 0.62  | 0.13    | 0.39    | 0.64  |  |
| Cefotaxime         |     | 0.28       | 0.54  | 0.11    | 0.29     | 0.52  | 0.09    | 0.91        | 0.99  | 0.72    | 0.27          | 0.52  | 0.07    | 0.59    | 0.82  |  |
| Cefuroxime         |     | 0.17       | 0.34  | 0.07    | 0.21     | 0.39  | 0.07    | 0.76        | 0.93  | 0.52    | 0.17          | 0.35  | 0.04    | 0.40    | 0.59  |  |
| Gentamicin         | NA  | NA         | NA    | NA      | 0.72     | 0.93  | 0.41    | 0.90        | 1.00  | 0.63    | 0.45          | 0.82  | 0.09    | 0.32    | 0.55  |  |
| Amikacin           |     | 0.71       | 0.96  | 0.36 NA | NA       | NA    | 0.69    | 0.97        | 0.25  | 0.68    | 0.96          | 0.18  | 0.03    | 0.22    | 0.00  |  |
| Coamoxiclav        |     | 0.18       | 0.35  | 0.08    | 0.19     | 0.36  | 0.07 NA | NA          | NA    | NA      | 0.29          | 0.62  | 0.12    | 0.44    | 0.64  |  |
| Ciprofloxacin      |     | 0.22       | 0.50  | 0.05    | 0.19     | 0.53  | 0.01    | 0.71        | 0.92  | 0.38 NA | NA            | NA    | NA      | 0.80    | 1.00  |  |
| Seprin             |     | 0.11       | 0.26  | 0.02    | 0.02     | 0.12  | 0.00    | 0.86        | 0.97  | 0.66    | 0.40          | 0.71  | 0.18 NA | NA      | NA    |  |

## Haemato-oncology Patients

| Initial_Antibiotic | Mid | Meropenem |       |      | Pip.Taz. |       |      | Ceftazidime |       |      | Cefotaxime. |       |      | Cefuroxime |       |  |
|--------------------|-----|-----------|-------|------|----------|-------|------|-------------|-------|------|-------------|-------|------|------------|-------|--|
|                    |     | Upper     | Lower | Mid  | Upper    | Lower | Mid  | Upper       | Lower | Mid  | Upper       | Lower | Mid  | Upper      | Lower |  |
| Meropenem          | NA  | NA        | NA    | x    | x        | x     | x    | x           | x     | x    | x           | x     | x    | x          | x     |  |
| Pip.Taz            |     | 0.01      | 0.07  | 0.00 | NA       | NA    | NA   | 0.36        | 0.57  | 0.20 | 0.29        | 0.48  | 0.14 | 0.48       | 0.68  |  |
| Ceftazidime        |     | 0.01      | 0.06  | 0.00 | 0.69     | 0.72  | 0.29 | NA          | NA    | NA   | 0.79        | 0.94  | 0.56 | 0.98       | 1.00  |  |
| Cefotaxime         |     | 0.06      | 0.20  | 0.00 | 0.26     | 0.44  | 0.13 | 0.50        | 0.69  | 0.34 | NA          | NA    | NA   | 1.00       | 0.97  |  |
| Cefuroxime         |     | 0.03      | 0.13  | 0.00 | 0.26     | 0.41  | 0.14 | 0.37        | 0.54  | 0.24 | 0.56        | 0.70  | 0.40 | NA         | NA    |  |
| Gentamicin         |     | 0.01      | 0.09  | 0.00 | 0.41     | 0.63  | 0.21 | 0.34        | 0.58  | 0.17 | 0.32        | 0.53  | 0.15 | 0.51       | 0.73  |  |
| Amikacin           |     | 0.02      | 0.18  | 0.00 | 0.44     | 0.79  | 0.14 | 0.57        | 0.88  | 0.26 | 0.63        | 0.89  | 0.31 | 0.72       | 0.93  |  |
| Coamoxiclav        |     | 0.02      | 0.07  | 0.00 | 0.23     | 0.32  | 0.14 | 0.14        | 0.22  | 0.08 | 0.25        | 0.35  | 0.16 | 0.41       | 0.51  |  |
| Ciprofloxacin      |     | 0.02      | 0.12  | 0.00 | 0.30     | 0.51  | 0.14 | 0.38        | 0.56  | 0.22 | 0.38        | 0.55  | 0.22 | 0.58       | 0.76  |  |
| Septin             |     | 0.03      | 0.10  | 0.00 | 0.16     | 0.26  | 0.08 | 0.14        | 0.23  | 0.08 | 0.31        | 0.42  | 0.20 | 0.39       | 0.50  |  |

  

| Initial_Antibiotic | Mid | Gentamicin |       |      | Amikacin |       |      | Coamoxiclav |       |      | Ciprofloxacin |       |      | Septin. |       |  |
|--------------------|-----|------------|-------|------|----------|-------|------|-------------|-------|------|---------------|-------|------|---------|-------|--|
|                    |     | Upper      | Lower | Mid  | Upper    | Lower | Mid  | Upper       | Lower | Mid  | Upper         | Lower | Mid  | Upper   | Lower |  |
| Meropenem          | x   | x          | x     | x    | x        | x     | x    | x           | x     | x    | x             | x     | x    | x       | x     |  |
| Pip.Taz            |     | 0.29       | 0.47  | 0.12 | 0.13     | 0.28  | 0.03 | 0.77        | 0.91  | 0.55 | 0.33          | 0.53  | 0.16 | 0.40    | 0.59  |  |
| Ceftazidime        |     | 0.34       | 0.55  | 0.16 | 0.14     | 0.34  | 0.02 | 0.70        | 0.87  | 0.46 | 0.57          | 0.78  | 0.33 | 0.48    | 0.73  |  |
| Cefotaxime         |     | 0.21       | 0.36  | 0.08 | 0.10     | 0.24  | 0.01 | 0.78        | 0.90  | 0.59 | 0.36          | 0.53  | 0.20 | 0.66    | 0.84  |  |
| Cefuroxime         |     | 0.19       | 0.30  | 0.09 | 0.08     | 0.18  | 0.02 | 0.74        | 0.85  | 0.57 | 0.33          | 0.47  | 0.21 | 0.49    | 0.65  |  |
| Gentamicin         | NA  | NA         | NA    | 0.13 | 0.30     | 0.02  | 0.73 | 0.90        | 0.51  | 0.58 | 0.32          | 0.37  | 0.68 | 0.90    |       |  |
| Amikacin           |     | 0.56       | 0.85  | 0.27 | NA       | NA    | NA   | 0.66        | 0.93  | 0.24 | 0.63          | 0.91  | 0.23 | 0.38    | 0.75  |  |
| Coamoxiclav        |     | 0.14       | 0.22  | 0.07 | 0.04     | 0.09  | 0.01 | NA          | NA    | NA   | 0.19          | 0.27  | 0.11 | 0.57    | 0.71  |  |
| Ciprofloxacin      |     | 0.42       | 0.61  | 0.26 | 0.11     | 0.26  | 0.01 | 0.58        | 0.78  | 0.35 | NA            | NA    | NA   | 0.48    | 0.68  |  |
| Septin             |     | 0.18       | 0.27  | 0.10 | 0.05     | 0.11  | 0.01 | 0.74        | 0.85  | 0.62 | 0.23          | 0.34  | 0.14 | NA      | NA    |  |

## Urine Source

| Initial_Antibiotic | Mid | Meropenem |       |      | Pip.Taz. |       |      | Ceftazidime |       |      | Cefotaxime. |       |      | Cefuroxime |       |  |
|--------------------|-----|-----------|-------|------|----------|-------|------|-------------|-------|------|-------------|-------|------|------------|-------|--|
|                    |     | Upper     | Lower | Mid  | Upper    | Lower | Mid  | Upper       | Lower | Mid  | Upper       | Lower | Mid  | Upper      | Lower |  |
| Meropenem          | NA  | NA        | NA    | 0.00 | NA       | 0.05  | 0.51 | 0.00        | 0.11  | 0.72 | 0.00        | 0.59  | 1.00 | 0.35       | 1.00  |  |
| Pip.Taz            |     | 0.05      | 0.16  | 0.00 | NA       | NA    | NA   | 0.49        | 0.70  | 0.23 | 0.41        | 0.63  | 0.17 | 0.60       | 0.80  |  |
| Ceftazidime        |     | 0.04      | 0.15  | 0.00 | 0.47     | 0.68  | 0.23 | NA          | NA    | NA   | 0.61        | 0.80  | 0.39 | 0.92       | 0.99  |  |
| Cefotaxime         |     | 0.11      | 0.25  | 0.02 | 0.38     | 0.59  | 0.17 | 0.64        | 0.82  | 0.44 | NA          | NA    | 0.99 | 1.00       | 0.93  |  |
| Cefuroxime         |     | 0.06      | 0.16  | 0.01 | 0.32     | 0.48  | 0.17 | 0.54        | 0.71  | 0.38 | 0.60        | 0.79  | 0.44 | NA         | NA    |  |
| Gentamicin         |     | 0.02      | 0.17  | 0.00 | 0.35     | 0.71  | 0.04 | 0.41        | 0.75  | 0.12 | 0.34        | 0.69  | 0.07 | 0.45       | 0.77  |  |
| Amikacin           |     | 0.02      | 0.18  | 0.00 | 0.65     | 0.99  | 0.19 | 0.49        | 0.91  | 0.06 | 0.82        | 1.00  | 0.31 | 0.83       | 1.00  |  |
| Coamoxiclav        |     | 0.04      | 0.09  | 0.01 | 0.28     | 0.39  | 0.18 | 0.29        | 0.40  | 0.19 | 0.29        | 0.41  | 0.19 | 0.46       | 0.57  |  |
| Ciprofloxacin      |     | 0.02      | 0.09  | 0.00 | 0.38     | 0.61  | 0.18 | 0.44        | 0.66  | 0.24 | 0.60        | 0.93  | 0.32 | 0.71       | 0.94  |  |
| Septin             |     | 0.08      | 0.22  | 0.02 | 0.26     | 0.44  | 0.10 | 0.28        | 0.46  | 0.14 | 0.45        | 0.65  | 0.28 | 0.56       | 0.76  |  |

  

| Initial_Antibiotic | Mid | Gentamicin |       |      | Amikacin |       |      | Coamoxiclav |       |      | Ciprofloxacin |       |      | Septin. |       |  |
|--------------------|-----|------------|-------|------|----------|-------|------|-------------|-------|------|---------------|-------|------|---------|-------|--|
|                    |     | Upper      | Lower | Mid  | Upper    | Lower | Mid  | Upper       | Lower | Mid  | Upper         | Lower | Mid  | Upper   | Lower |  |
| Meropenem          |     | 0.10       | 0.73  | 0.00 | 0.01     | 0.06  | 0.00 | 0.94        | 1.00  | 0.36 | 0.17          | 0.65  | 0.00 | 0.96    | 1.00  |  |
| Pip.Taz            |     | 0.14       | 0.32  | 0.02 | 0.18     | 0.40  | 0.05 | 0.94        | 1.00  | 0.77 | 0.32          | 0.52  | 0.13 | 0.37    | 0.60  |  |
| Ceftazidime        |     | 0.11       | 0.16  | 0.01 | 0.32     | 0.48  | 0.17 | 0.54        | 0.71  | 0.38 | 0.60          | 0.79  | 0.44 | NA      | NA    |  |
| Cefotaxime         |     | 0.18       | 0.36  | 0.05 | 0.19     | 0.37  | 0.06 | 0.88        | 0.97  | 0.72 | 0.43          | 0.67  | 0.24 | 0.56    | 0.77  |  |
| Cefuroxime         |     | 0.12       | 0.23  | 0.04 | 0.11     | 0.22  | 0.03 | 0.81        | 0.91  | 0.67 | 0.30          | 0.49  | 0.16 | 0.44    | 0.68  |  |
| Gentamicin         | NA  | NA         | NA    | 0.14 | 0.42     | 0.00  | 0.95 | 1.00        | 0.75  | 0.41 | 0.77          | 0.08  | 0.68 | 0.94    |       |  |
| Amikacin           |     | 0.29       | 0.74  | 0.01 | NA       | NA    | 0.85 | 1.00        | 0.33  | 0.81 | 1.00          | 0.28  | 0.73 | 1.00    |       |  |
| Coamoxiclav        |     | 0.12       | 0.21  | 0.05 | 0.06     | 0.13  | 0.02 | NA          | NA    | 0.22 | 0.44          | 0.11  | 0.34 | 0.46    |       |  |
| Ciprofloxacin      |     | 0.25       | 0.50  | 0.07 | 0.25     | 0.47  | 0.09 | 0.88        | 0.98  | 0.73 | NA            | NA    | NA   | 0.54    |       |  |
| Septin             |     | 0.17       | 0.32  | 0.06 | 0.07     | 0.18  | 0.01 | 0.81        | 0.92  | 0.64 | 0.32          | 0.49  | 0.17 | NA      |       |  |

## GI source

| Initial_Antibiotic | Mid | Meropenem |       |      | Pip.Taz. |       |      | Ceftazidime |       |      | Cefotaxime. |       |      | Cefuroxime |       |  |
|--------------------|-----|-----------|-------|------|----------|-------|------|-------------|-------|------|-------------|-------|------|------------|-------|--|
|                    |     | Upper     | Lower | Mid  | Upper    | Lower | Mid  | Upper       | Lower | Mid  | Upper       | Lower | Mid  | Upper      | Lower |  |
| Meropenem          | NA  | NA        | NA    | 0.90 | NA       | 0.59  | 0.88 | 1.00        | 0.57  | 0.88 | 1.00        | 0.78  | 0.98 | 1.00       |       |  |
| Pip.Taz            |     | 0.34      | 0.58  | 0.14 | NA       | NA    | 0.52 | 0.81        | 1.00  | 0.18 | 0.65        | 0.86  | 0.33 | 0.74       |       |  |
| Ceftazidime        |     | 0.58      | 0.90  | 0.25 | 0.92     | 1.00  | 0.65 | NA          | NA    | 0.92 | 1.00        | 0.69  | 0.90 | 1.00       |       |  |
| Cefotaxime         |     | 0.37      | 0.67  | 0.15 | 0.67     | 0.89  | 0.40 | 0.57        | 0.82  | 0.34 | NA          | NA    | 0.95 | 1.00       |       |  |
| Cefuroxime         |     | 0.28      | 0.54  | 0.11 | 0.61     | 0.86  | 0.35 | 0.42        | 0.66  | 0.23 | 0.71        | 0.87  | 0.52 | NA         |       |  |
| Gentamicin         |     | 0.48      | 0.84  | 0.17 | 0.92     | 1.00  | 0.66 | 0.91        | 1.00  | 0.64 | 0.89        | 1.00  | 0.91 | 1.00       |       |  |
| Amikacin           |     | 0.15      | 0.93  | 0.12 | 0.96     | 1.00  | 0.68 | 0.96        | 1.00  | 0.73 | 0.95        | 1.00  | 0.66 | 0.95       |       |  |
| Coamoxiclav        |     | 0.16      | 0.31  | 0.06 | 0.49     | 0.68  | 0.30 | 0.28        | 0.44  | 0.15 | 0.44        | 0.61  | 0.26 | 0.54       |       |  |
| Ciprofloxacin      |     | 0.44      | 0.86  | 0.06 | 0.86     | 1.00  | 0.42 | 0.83        | 1.00  | 0.41 | 0.91        | 1.00  | 0.53 | 0.94       |       |  |
| Septin             |     | 0.22      | 0.47  | 0.06 | 0.36     | 0.66  | 0.13 | 0.30        | 0.56  | 0.12 | 0.61        | 0.83  | 0.32 | 0.66       |       |  |

  

| Initial_Antibiotic | Mid | Gentamicin |       |      | Amikacin |       |      | Coamoxiclav |       |      | Ciprofloxacin |       |      | Septin. |       |  |
|--------------------|-----|------------|-------|------|----------|-------|------|-------------|-------|------|---------------|-------|------|---------|-------|--|
|                    |     | Upper      | Lower | Mid  | Upper    | Lower | Mid  | Upper       | Lower | Mid  | Upper         | Lower | Mid  | Upper   | Lower |  |
| Pip.Taz            |     | 0.45       | 0.70  | 0.22 | 0.28     | 0.55  | 0.09 | 0.99        | 1.00  | 0.95 | 0.26          | 0.50  | 0.09 | 0.31    |       |  |
| Ceftazidime        |     | 0.82       | 0.99  | 0.46 | 0.66     | 0.96  | 0.23 | 0.99        | 1.00  | 0.90 | 0.44          | 0.89  | 0.13 | 0.43    |       |  |
| Cefotaxime         |     | 0.52       | 0.83  | 0.22 | 0.39     | 0.74  | 0.10 | 0.99        | 1.00  | 0.96 | 0.24          | 0.52  | 0.07 | 0.51    |       |  |
| Cefuroxime         |     | 0.41       | 0.71  | 0.16 | 0.27     | 0.57  | 0.07 | 0.98        | 1.00  | 0.89 | 0.17          | 0.39  | 0.05 | 0.42    |       |  |
| Gentamicin         | NA  | NA         | NA    | 0.47 | 0.87     | 0.12  | 0.86 | 1.00        | 0.51  | 0.37 | 0.84          | 0.06  | 0.49 |         |       |  |
| Amikacin           |     | 0.99       | 1.00  | 0.85 | NA       | NA    | 0.97 | 1.00        | 0.72  | x    | x             | 0.23  | 0.69 |         |       |  |
| Coamoxiclav        |     | 0.19       | 0.35  | 0.09 | 0.14     | 0.31  | 0.03 | NA          | NA    | 0.09 | 0.20          | 0.03  | 0.39 |         |       |  |
| Ciprofloxacin      |     | 0.73       | 0.99  | 0.27 | 0.30     | 0.92  | 0.00 | 0.92        | 1.00  | 0.54 | NA            | NA    | 0.67 |         |       |  |
| Septin             |     | 0.21       | 0.45  | 0.06 | 0.04     | 0.20  | 0.00 | 0.93        | 0.99  | 0.79 | 0.13          | 0.34  | 0.03 |         |       |  |

## Patients over 80 years

| Initial.Antibioti | Mid | Meropenem  |       |      | Pip.Taz. |       |      | Ceftazidime |       |      | Cefotaxime.   |       |      | Cefuroxime |       |      |      |
|-------------------|-----|------------|-------|------|----------|-------|------|-------------|-------|------|---------------|-------|------|------------|-------|------|------|
|                   |     | Upper      | Lower | Mid  | Upper    | Lower | Mid  | Upper       | Lower | Mid  | Upper         | Lower | Mid  | Upper      | Lower |      |      |
| Meropenem         | NA  | 0.34       | 0.58  | 0.14 | NA       | 0.90  | 1.00 | 0.59        | 0.88  | 1.00 | 0.57          | 0.98  | 1.00 | 0.78       | 0.98  | 1.00 | 0.78 |
| Pip.Taz           | NA  | 0.58       | 0.90  | 0.25 | 0.92     | 1.00  | 0.65 | NA          | 0.52  | 0.81 | 0.18          | 0.65  | 0.86 | 0.33       | 0.74  | 0.91 | 0.50 |
| Ceftazidime       |     | 0.37       | 0.67  | 0.15 | 0.67     | 0.89  | 0.40 | 0.57        | 0.82  | 0.34 | NA            | NA    | NA   | 0.95       | 1.00  | 0.81 | 0.81 |
| Cefotaxime        |     | 0.28       | 0.54  | 0.11 | 0.61     | 0.86  | 0.35 | 0.42        | 0.66  | 0.23 | 0.71          | 0.87  | 0.52 | NA         | NA    | NA   | NA   |
| Cefuroxime        |     | 0.48       | 0.84  | 0.17 | 0.92     | 1.00  | 0.66 | 0.91        | 1.00  | 0.64 | 0.89          | 1.00  | 0.59 | 0.91       | 1.00  | 0.64 | 0.64 |
| Gentamicin        |     | 0.55       | 0.93  | 0.12 | 0.96     | 1.00  | 0.68 | 0.96        | 1.00  | 0.73 | 0.95          | 1.00  | 0.66 | 0.95       | 1.00  | 0.62 | 0.62 |
| Amikacin          |     | 0.16       | 0.31  | 0.06 | 0.49     | 0.68  | 0.30 | 0.28        | 0.44  | 0.15 | 0.44          | 0.61  | 0.26 | 0.54       | 0.73  | 0.32 | 0.32 |
| Coamoxiclav       |     | 0.44       | 0.86  | 0.06 | 0.86     | 1.00  | 0.42 | 0.83        | 1.00  | 0.41 | 0.91          | 1.00  | 0.53 | 0.94       | 1.00  | 0.60 | 0.60 |
| Ciprofloxacin     |     | 0.22       | 0.47  | 0.06 | 0.36     | 0.66  | 0.13 | 0.30        | 0.56  | 0.12 | 0.61          | 0.83  | 0.32 | 0.66       | 0.87  | 0.36 | 0.36 |
| Seprin            |     |            |       |      |          |       |      |             |       |      |               |       |      |            |       |      |      |
|                   |     |            |       |      |          |       |      |             |       |      |               |       |      |            |       |      |      |
|                   |     |            |       |      |          |       |      |             |       |      |               |       |      |            |       |      |      |
| Initial.Antibioti | Mid | Gentamicin |       |      | Amikacin |       |      | Coamoxiclav |       |      | Ciprofloxacin |       |      | Seprin.    |       |      |      |
|                   |     | Upper      | Lower | Mid  | Upper    | Lower | Mid  | Upper       | Lower | Mid  | Upper         | Lower | Mid  | Upper      | Lower |      |      |
| Pip.Taz           |     | 0.45       | 0.70  | 0.22 | 0.28     | 0.55  | 0.09 | 0.99        | 1.00  | 0.95 | 0.26          | 0.50  | 0.09 | 0.31       | 0.54  | 0.11 |      |
| Ceftazidime       |     | 0.82       | 0.99  | 0.46 | 0.66     | 0.96  | 0.23 | 0.99        | 1.00  | 0.90 | 0.44          | 0.89  | 0.13 | 0.43       | 0.72  | 0.14 |      |
| Cefotaxime        |     | 0.52       | 0.83  | 0.22 | 0.39     | 0.74  | 0.10 | 0.99        | 1.00  | 0.96 | 0.24          | 0.52  | 0.07 | 0.51       | 0.77  | 0.22 |      |
| Cefuroxime        |     | 0.41       | 0.71  | 0.16 | 0.27     | 0.57  | 0.07 | 0.98        | 1.00  | 0.89 | 0.17          | 0.39  | 0.05 | 0.42       | 0.64  | 0.18 |      |
| Gentamicin        | NA  | NA         | NA    | 0.47 | 0.87     | 0.12  | 0.86 | 1.00        | 0.51  | 0.37 | 0.84          | 0.06  | 0.49 | 0.80       | 0.15  |      |      |
| Amikacin          |     | 0.99       | 1.00  | 0.85 | NA       | NA    | NA   | 0.97        | 1.00  | 0.72 | x             | x     | x    | 0.23       | 0.69  | 0.01 |      |
| Coamoxiclav       |     | 0.19       | 0.35  | 0.09 | 0.14     | 0.31  | 0.03 | NA          | NA    | 0.09 | 0.20          | 0.03  | 0.39 | 0.55       | 0.22  |      |      |
| Ciprofloxacin     |     | 0.73       | 0.99  | 0.27 | 0.30     | 0.92  | 0.00 | 0.92        | 1.00  | 0.54 | NA            | NA    | NA   | 0.67       | 0.97  | 0.22 |      |
| Seprin            |     | 0.21       | 0.45  | 0.06 | 0.04     | 0.20  | 0.00 | 0.93        | 0.99  | 0.79 | 0.13          | 0.34  | 0.03 | NA         | NA    | NA   |      |

Patients Under 18
